# Supplementary material for: Purification and Characterization of a Novel Alginate Lyase from the Marine Bacterium Bacillus sp. Alg07
Source: MDPI journal article supplement (doi:10.3390/md16030086), 2018-03-09
Supplement: s1 [file s1]

**Supplementary Material**

**Purification and Characterization of a Novel  
Alginate Lyase from Marine Bacterium *Bacillus*  
sp.Alg07**

**Peng Chen <sup>1,2</sup>, Yueming Zhu <sup>1</sup>, Yan Men <sup>1</sup>, Yan Zeng <sup>1</sup> and Yuanxia Sun <sup>1,\*</sup>**

<sup>1</sup> National Engineering Laboratory for Industrial Enzymes, Tianjin Institute of Industrial Biotechnology, Chinese Academy of Sciences, Tianjin 300308, China; chen\_p@tib.cas.cn

<sup>2</sup> University of Chinese Academy of Sciences, Beijing 100049, China

\* Correspondence: syx0430@hotmail.com; Tel.: +86-022-8486-1960

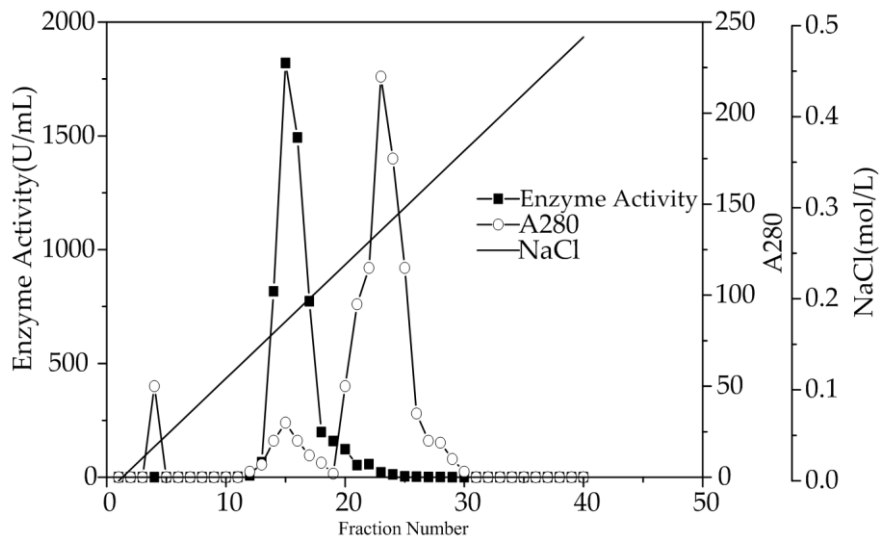

**Figure S1** Purification of alginate lyase by anion exchange chromatograph (Source 15Q)

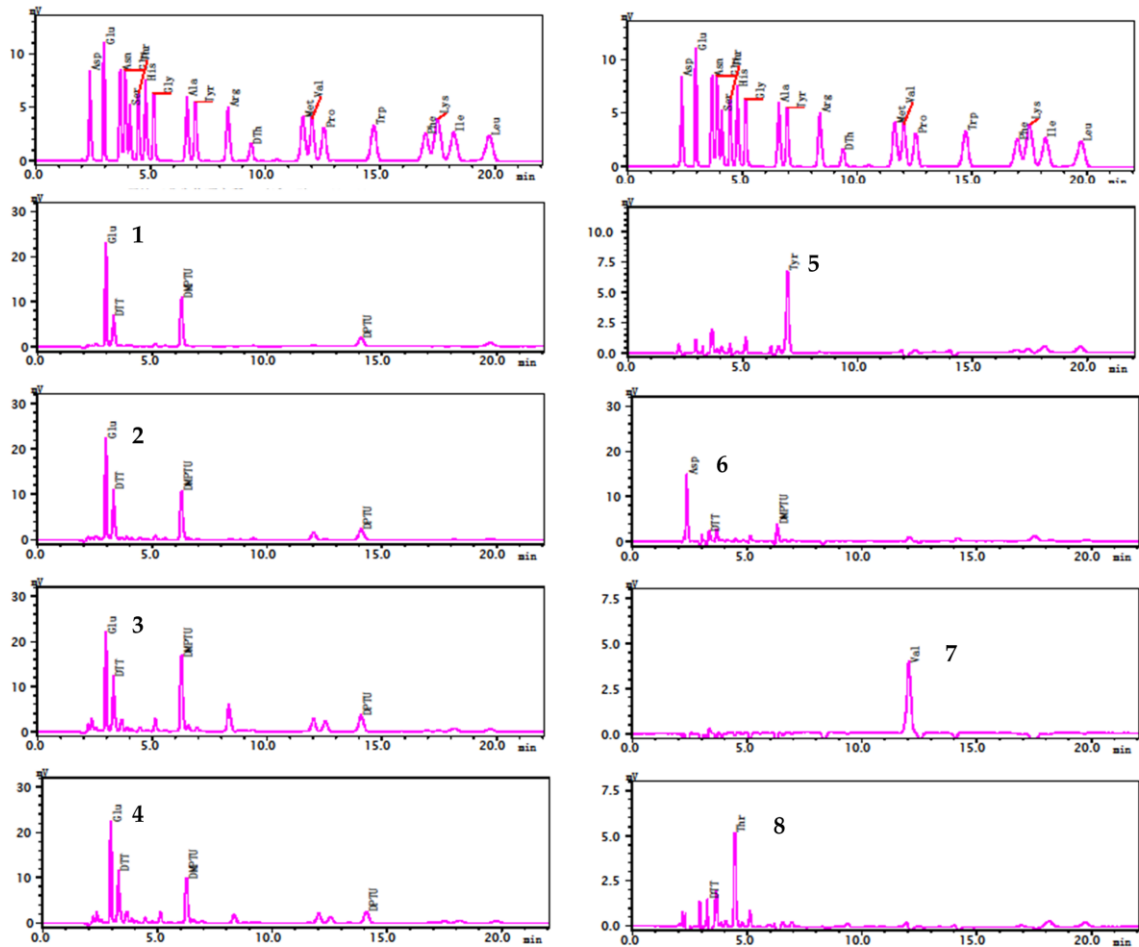

**Figure S2** The N-terminal amino acid sequence of the purified Alga

1: Glu; 2: Glu; 3: Glu; 4: Glu; 5: Tyr; 6: Asp; 7: Val; 8: Thr.

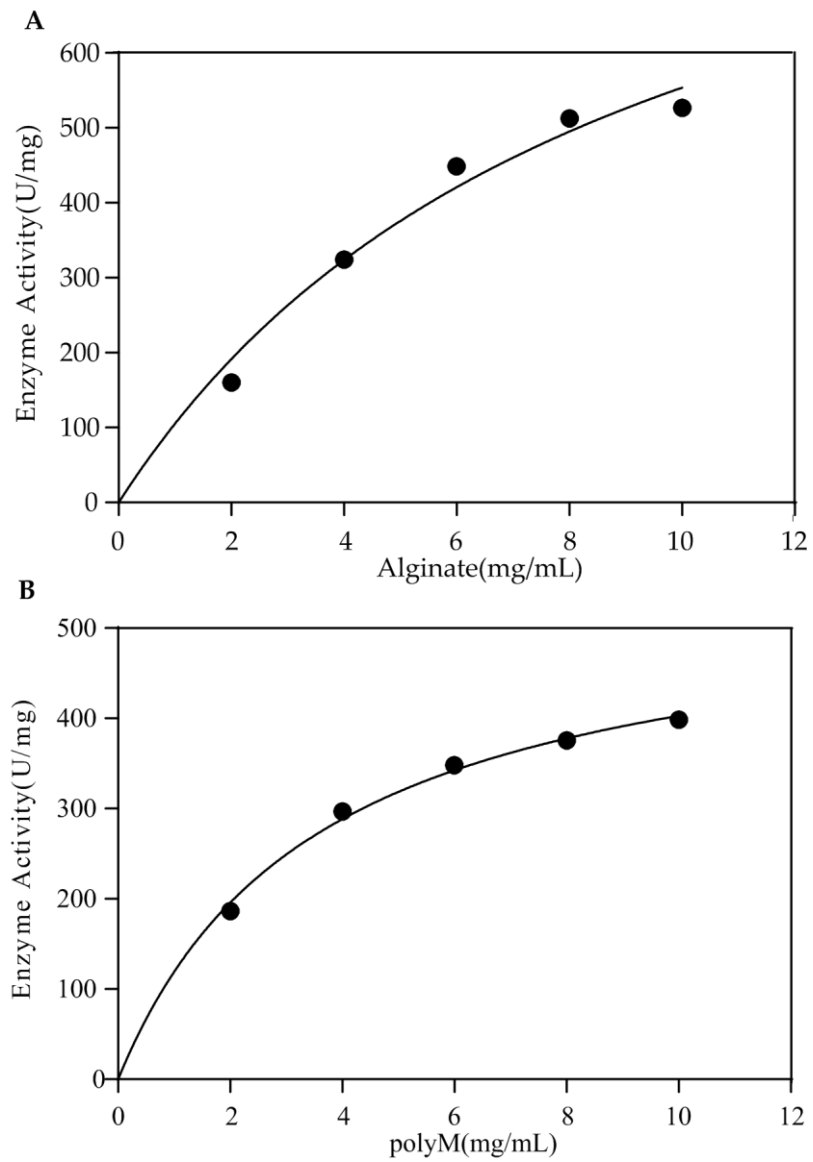

**Figure S3** Effects of substrate concentration on the activity of AlgA. The activity of the enzyme was measured in the presence of indicated concentrations of substrates (A) sodium alginate, (B) PolyM.
